# Supplementary material
Source: Preprints.org preprint supplement (doi:10.20944/preprints201903.0172.v1)
Supplement: Supplementary file 5 [file Supplementary Table 4.docx]

**Table S4.** Distribution of participants by number of nutrients below adequate intake according to EFSA criteria by DDS stratified by sex

|  | **MEN** | | | | |
| --- | --- | --- | --- | --- | --- |
|  | **Q1 (n=787)** | **Q2 (n=763)** | **Q3 (n=973)** | **Q4 (n=489)** | **P value** |
| **Number of inadequacies, mean ±SD** | 3.5±0.8 | 3.1±1.0 | 2.8±1.1 | 2.2±1.0 | <0.0011 |
| **Participants with ≥4 nutrients below AR/AI, n (%)** | 778 (69.7) | 432 (47.2) | 253 (32.9) | 81 (13.5) | <0.0012 |
|  | **WOMEN** | | | | |
|  | **Q1 (n=630)** | **Q2 (n=610)** | **Q3 (n=884)** | **Q4 (n=529)** | **P value** |
| **Number of inadequacies, mean (SD)** | 3.4±0.8 | 3.1±1.0 | 2.7±1.1 | 2.1±1.1 | <0.0011 |
| **Participants with ≥4 nutrients below AR/AI, n (%)** | 335 (63.1) | 330 (45.1) | 284 (32.4) | 136 (13.0) | <0.0012 |

1P value: Pearson´s Chi-Square test was used to estimate differences among prevalence of inadequate nutrient intake according to quartiles of DDS for sex strata. 2P value: ANOVA test was performed to estimate differences among mean of inadequate nutrient intakes according for each DDS quartile**.**
